# Supplementary material for: Identification of a Contact-Dependent Growth Inhibition (CDI) System That Reduces Biofilm Formation and Host Cell Adhesion of Acinetobacter baumannii DSM30011 Strain
Source: PubMed Central journal article supplement (PMC6831553; doi:10.3389/fmicb.2019.02450), 2019-10-30
Supplement: Data_Sheet_1.pdf [file Data_Sheet_1.pdf]

# **Identification of a CDI system that reduces biofilm formation and host cell adhesion of *Acinetobacter baumannii* DSM30011 strain**

Morgane Roussin<sup>1</sup>, Sedera Rabarioelina<sup>1</sup>, Laurence Cluzeau<sup>1</sup>, Julien Cayron<sup>2</sup>, Christian Lesterlin<sup>2</sup>, Suzana P. Salcedo<sup>1\*</sup> and Sarah Bigot<sup>1,2\*</sup>

## **Supplementary data**

### **Supplementary Figure legends**

**Supplementary Figure S1. Effect of CdiA<sub>2</sub>-CT production on *E. coli* cell viability and filamentation.** (A) The cell viability of *E. coli* DH5 $\alpha$  strain producing CdiA<sub>2</sub>-CT with or without CdiI<sub>2</sub> was estimated in colony forming unit (CFU) /ml. Means from three biological replicates are plotted. (B) Cell length repartition of *E. coli* DH5 $\alpha$  (*recA*<sup>-</sup>) and RecA-GFP producing MG1655 (*recA*<sup>+</sup>) 3 h after induction of CdiA<sub>2</sub>-CT toxin. n indicate the number of analysed cells.

**Supplementary Figure S2. The CdiA<sub>1</sub>-CT producing *E. coli* strain are viable cells.** (A) HU-mCherry producing *E. coli* MG1655 growth monitored by measuring the optical density at 600 nm (dotted lines) and colony forming unit (CFU) /ml (bars) after induction of CdiA<sub>1</sub>-CT in presence or in absence of CdiI<sub>1</sub>. Means from three biological replicates are plotted. (B) Live and dead assay performed with RecA-GFP *E. coli* MG1655 strain 3 h after induction of CdiA<sub>1</sub>-CT in presence or absence of CdiI<sub>1</sub>. Before staining, the bacteria were treated with or without (w/o) ethanol. Left panel: representative fluorescence microscopy of CdiA<sub>1</sub>-CT producing cells

after staining with SYTO9 and Propidium iodide (PI). Scale bar corresponds to 1  $\mu\text{m}$ ; right panel: percentage of dead cells. n indicate the number of analysed cells.

**Supplementary Figure S3. Growth analysis of *A. baumannii* DSM30011 wild-type and mutant strains.** The growth was monitored in LB medium by measurement of optical density at 600 nm ( $\text{OD}_{600}$ ) (solid lines) and colony forming unit (CFU) /ml (bars).

**Supplementary Figure S4.** Confocal microscopy images correspond to 3D projections of the maximum intensities obtained from z-stacks of biofilms formed by the wild-type and  $\Delta\text{cdiBAI}_1$  strains on glass-bottom slides at 3, 5 and 24h. Bacteria were labelled with DAPI. Scale bar 10  $\mu\text{m}$ .

**Supplementary Figure S5. Z-stack analysis of *A. baumannii* adhesion to lung epithelial cells.** Confocal microscopy of A549 cells infected with *A. baumannii* DSM30011 wild-type and  $\Delta\text{cdiBAI}_1$  strains during 2 hours. The corresponding axis are shown. Bacteria were labeled with an anti-*Acinetobacter* antibody (green), the actin cytoskeleton with phalloidin (grey) and nuclei with DAPI (blue).

**Supplementary Figure S6. The  $\text{CdiA}_1^{\text{AbSDF}}$  is produced in *A. baumannii* SDF strain.** (A) Schematic of the  $\text{cdi}_1^{\text{AbSDF}}$  and  $\text{cdi}_2^{\text{AbSDF}}$  loci. Genes encoding putative CdiB transporters, CdiA exoproteins and CdiI immunity proteins are colored respectively in brown, green and orange.  $\text{cdiC}$  genes shown in red encode proteins that share high homologies with HlyC acyltransferases that activate the  $\alpha$ -hemolysin HlyA in *E. coli* through fatty acylation using acyl-acyl carrier protein (acyl-ACP) as the fatty acid donor (Ogier et al., 2016).  $\text{cdi}_1^{\text{AbSDF}}$  locus refers to *ABSDF\_RS16855*, *ABSDF\_RS16850*, *ABSDF\_RS16845*, *ABSDF\_RS16840* genes and  $\text{cdi}_2^{\text{AbSDF}}$  to *ABSDF\_RS16500*, *ABSDF\_RS16505*, *ABSDF\_RS16510\**, *ABSDF\_RS16515*. \* indicates the truncated version of the annotated gene on the NCBI database; the 3'-end of the gene was sequenced and the result is shown in Supplementary Figure S7. (B) Cell extract (CE) of wild-type strain grown overnight was analyzed by blue Coomassie staining. Arrow indicates

the CdiA<sub>1</sub><sup>AbSDF</sup> protein identified by mass spectrometry. Molecular weight marker (kDa) is indicated on the left.

**Supplementary Figure S7. Sequence of complete *ABSDF\_RS16510* gene in *A. baumannii* SDF strain.** Bold sequence shows the annotated gene on the NCBI database, italic the intergenic sequence and the start codon of the potential *cdiI<sub>2</sub><sup>AbSDF</sup>* (*ABSDF\_RS16515*) immunity gene is underlined.

**Movie 1.** Time-lapse fluorescence microscopy of the recombinant HU-mCherry protein produced by *E. coli* MG1655 strain after induction of the CdiA<sub>2</sub>-CT.

**Movie 2.** Time-lapse fluorescence microscopy of the recombinant HU-mCherry protein produced by *E. coli* MG1655 strain after induction of the CdiA<sub>2</sub>-CT in presence of its cognate CdiI<sub>2</sub> immunity protein.

**Movie 3.** Time-lapse fluorescence microscopy of the recombinant RecA-GFP protein produced by *E. coli* MG1655 strain after induction of the CdiA<sub>2</sub>-CT.

**Movie 4.** Time-lapse fluorescence microscopy of the recombinant RecA-GFP protein produced by *E. coli* MG1655 strain after induction of the CdiA<sub>2</sub>-CT in presence of its cognate CdiI<sub>2</sub> immunity protein.

**Movie 5.** Time-lapse fluorescence microscopy of the recombinant HU-mCherry protein produced by *E. coli* MG1655 strain after induction of the CdiA<sub>1</sub>-CT.

**Movie 6.** Time-lapse fluorescence microscopy of the recombinant RecA-GFP protein produced by *E. coli* MG1655 strain after induction of the CdiA<sub>1</sub>-CT.

**Movie 7.** Time-lapse fluorescence microscopy of the recombinant HU-mCherry protein produced by *E. coli* MG1655 strain after induction of the CdiA<sub>1</sub>-CT in presence of its cognate CdiI<sub>1</sub> immunity protein.

**Movie 8.** Time-lapse fluorescence microscopy of the recombinant RecA-GFP protein produced by *E. coli* MG1655 strain after induction of the CdiA<sub>1</sub>-CT in presence of its cognate CdiI<sub>1</sub> immunity protein.

**Supplementary Table S1.** Plasmids and strains used in this study

| Plasmids                                        | Description                                                                                                                                                                           | Source                      |
|-------------------------------------------------|---------------------------------------------------------------------------------------------------------------------------------------------------------------------------------------|-----------------------------|
| pKD3                                            | Carries <i>FRT-Cm-FRT</i> used for $\lambda$ red integration ; Cm <sup>R</sup>                                                                                                        | (Datsenko and Wanner, 2000) |
| pKD3-AS- <i>recA-Cm</i>                         | Carries <i>recA</i> gene under its own promoter used for LY653 construction; Cm <sup>R</sup>                                                                                          | This study                  |
| pKD4                                            | Carries <i>FRT-kan-FRT</i> used for RecET integration; Kn <sup>R</sup>                                                                                                                | (Datsenko and Wanner, 2000) |
| pCP20                                           | Site-specific excision vector, Flp recombinase expression; Ap <sup>R</sup>                                                                                                            | (Datsenko and Wanner, 2000) |
| pAT02                                           | Expresses the Rec <sub>CAb</sub> recombinase; Ap <sup>R</sup>                                                                                                                         | (Tucker et al., 2014)       |
| pFLP2                                           | Site-specific excision vector, Flp recombinase expression; Ap <sup>R</sup>                                                                                                            | (Hoang et al., 2000)        |
| pMHL2-2                                         | Apramycin cassette, Apra <sup>R</sup>                                                                                                                                                 | (Godeux et al., 2018)       |
| pUA66                                           | <i>gfpmut2</i> gene under the control of <i>rrnB</i> promoter; Kn <sup>R</sup>                                                                                                        | (Zaslaver et al., 2006)     |
| pWH1266                                         | Expression plasmid, <i>E. coli</i> - <i>Acinetobacter</i> shuttle plasmid; Ap <sup>R</sup>                                                                                            | (Hunger et al., 1990)       |
| pWH1266-P <sub>empty</sub> - <i>gfp</i>         | pWH1266 containing promoterless <i>gfp</i> gene; Ap <sup>R</sup>                                                                                                                      | This study                  |
| pWH1266-P <i>cdiB</i> <sub>1</sub> - <i>gfp</i> | pWH1266 containing 500 bp upstream <i>cdiB</i> <sub>1</sub> gene from <i>A. baumannii</i> DSM30011 fused to <i>gfp</i> gene; Ap <sup>R</sup>                                          | This study                  |
| pWH1266-P <i>cdiA</i> <sub>1</sub> - <i>gfp</i> | pWH1266 containing 500 bp upstream <i>cdiA</i> <sub>1</sub> gene from <i>A. baumannii</i> DSM30011 fused to <i>gfp</i> gene; Ap <sup>R</sup>                                          | This study                  |
| pWH1266-P <i>cdiI</i> <sub>1</sub> - <i>gfp</i> | pWH1266 containing 500 bp upstream <i>cdiI</i> <sub>1</sub> gene from <i>A. baumannii</i> DSM30011 fused to <i>gfp</i> gene; Ap <sup>R</sup>                                          | This study                  |
| pWH1266-P <i>cdiB</i> <sub>2</sub> - <i>gfp</i> | pWH1266 containing 500 bp upstream <i>cdiB</i> <sub>2</sub> gene from <i>A. baumannii</i> DSM30011 fused to <i>gfp</i> gene; Ap <sup>R</sup>                                          | This study                  |
| pWH1266-P <i>cdiA</i> <sub>2</sub> - <i>gfp</i> | pWH1266 containing 500 bp upstream <i>cdiA</i> <sub>2</sub> gene from <i>A. baumannii</i> DSM30011 fused to <i>gfp</i> gene; Ap <sup>R</sup>                                          | This study                  |
| pWH1266-P <i>cdiI</i> <sub>2</sub> - <i>gfp</i> | pWH1266 containing 500 bp upstream <i>cdiI</i> <sub>2</sub> gene from <i>A. baumannii</i> DSM30011 fused to <i>gfp</i> gene; Ap <sup>R</sup>                                          | This study                  |
| pUC18T-mini-Tn7T-Gm                             | mini-Tn7T based vector; mobilizable; Ap <sup>R</sup> Gm <sup>R</sup>                                                                                                                  | (Choi and Schweizer, 2006)  |
| pUC18T-mini-Tn7-Ap                              | Gm <sup>R</sup> removed from pUC18T-mini-Tn7T-Gm by <i>Xba</i> I digestion and self-ligation; Ap <sup>R</sup>                                                                         | This study                  |
| pUC18T- $\Delta$ <i>cdiA</i> <sub>1</sub>       | 2 kb with homology to the flanking regions of <i>cdiA</i> <sub>1</sub>                                                                                                                | This study                  |
| pUC18T- $\Delta$ <i>cdiA</i> <sub>1</sub> -Apra | Apramycin cassette flanked by 2kb upstream and downstream of <i>cdiA</i> <sub>1</sub> ; Ap <sup>R</sup> , Apra <sup>R</sup>                                                           | This study                  |
| pUC18T- $\Delta$ <i>cdiB</i> <sub>1</sub>       | 2 kb with homology to the flanking regions of <i>cdiB</i> <sub>1</sub>                                                                                                                | This study                  |
| pUC18T- $\Delta$ <i>cdiB</i> <sub>1</sub> -Apra | Apramycin cassette flanked by 2kb upstream and downstream of <i>cdiB</i> <sub>1</sub> ; Ap <sup>R</sup> , Apra <sup>R</sup>                                                           | This study                  |
| pBAD33                                          | Arabinose inducible expression plasmid, Cm <sup>R</sup>                                                                                                                               | (Guzman et al., 1995)       |
| pBAD33-CdiA <sub>1</sub> -CT                    | pBAD33 containing <i>cdiA-CT</i> <sub>1</sub> <sup>Ab30011</sup> toxin (residues Val <sup>4746</sup> - Arg <sup>5104</sup> of CdiA <sub>1</sub> <sup>Ab30011</sup> ); Cm <sup>R</sup> | This study                  |
| pBAD33-CdiA <sub>2</sub> -CT                    | Expresses <i>cdiA-CT</i> <sub>2</sub> <sup>Ab30011</sup> toxin (residues Ala <sup>1715</sup> - Tyr <sup>1950</sup> of CdiA <sub>2</sub> <sup>Ab30011</sup> ); Cm <sup>R</sup>         | This study                  |
| pTrec99a                                        | IPTG-inducible expression plasmid; Ap <sup>R</sup>                                                                                                                                    | GE healthcare               |
| pTrec99a-CdiI <sub>1</sub> -His <sub>6</sub>    | IPTG-inducible expression of CdiI <sub>1</sub> <sup>Ab30011</sup> -His <sub>6</sub> immunity gene; Ap <sup>R</sup>                                                                    | This study                  |

|                                                  |                                                                                                                                                                                                                                                                                                                                                              |                                                                                                         |
|--------------------------------------------------|--------------------------------------------------------------------------------------------------------------------------------------------------------------------------------------------------------------------------------------------------------------------------------------------------------------------------------------------------------------|---------------------------------------------------------------------------------------------------------|
| pTrc99a-CdiI <sub>2</sub> -His <sub>6</sub>      | IPTG-inducible expression of CdiI <sub>2</sub> <sup>Ab30011</sup> -His <sub>6</sub> immunity gene; Ap <sup>R</sup>                                                                                                                                                                                                                                           | This study                                                                                              |
| <b>Strains</b>                                   | <b>Description</b>                                                                                                                                                                                                                                                                                                                                           | <b>Source</b>                                                                                           |
| <b><i>E. coli</i></b>                            |                                                                                                                                                                                                                                                                                                                                                              |                                                                                                         |
| Top10                                            | General cloning<br><i>F</i> <sup>-</sup> <i>mcrA</i> $\Delta$ ( <i>mrr</i> - <i>hsdRMS</i> - <i>mcrBC</i> ) $\phi$ 80 <i>lacZ</i> $\Delta$ <i>M15</i> $\Delta$ <i>lacX74</i> <i>nupG</i> <i>recA1</i> <i>araD139</i> $\Delta$ ( <i>ara-leu</i> )7697 <i>galE15</i> <i>galK16</i> <i>rpsL</i> ( <i>Str</i> <sup>R</sup> ) <i>endA1</i> $\lambda$ <sup>-</sup> | Invitrogen                                                                                              |
| DH5 $\alpha$                                     | General cloning and toxicity assay<br><i>F</i> <sup>-</sup> <i>endA1</i> <i>glnV44</i> <i>thi-1</i> <i>recA1</i> <i>relA1</i> <i>gyrA96</i> <i>deoR</i> <i>nupG</i> <i>purB20</i> $\phi$ 80 <i>dlacZ</i> $\Delta$ <i>M15</i> $\Delta$ ( <i>lacZYA-argF</i> )U169, <i>hsdR17</i> ( <i>rK</i> <sup>-</sup> <i>mK</i> <sup>+</sup> ), $\lambda$                 | Lab collection                                                                                          |
| BW25141                                          | $\Delta$ ( <i>araD-araB</i> )567, $\Delta$ <i>lacZ</i> 4787(:: <i>rrnB-3</i> ), $\Delta$ ( <i>phoB-phoR</i> )580, $\lambda$ <sup>-</sup> , <i>galU95</i> , $\Delta$ <i>uidA3</i> :: <i>pir</i> <sup>+</sup> , <i>recA1</i> , <i>endA9</i> ( <i>del-ins</i> :: <i>FRT</i> , <i>rph-1</i> , $\Delta$ ( <i>rhaD-rhaB</i> )568, <i>hsdR514</i>                   | Lab collection                                                                                          |
| DY330                                            | W3110 $\Delta$ <i>lacUI</i> 69, <i>gal490</i> , $\lambda$ <i>cI</i> 857, $\Delta$ ( <i>cro-bioA</i> )                                                                                                                                                                                                                                                        | (Yu et al., 2000)                                                                                       |
| MG1655                                           | $\lambda$ <sup>-</sup> , <i>rph-1</i>                                                                                                                                                                                                                                                                                                                        | Coli Genetic Stock Center (CGSC) #6300                                                                  |
| MS388                                            | MG1655 <i>rpsL</i> <sup>+</sup> , <i>Str</i> <sup>R</sup>                                                                                                                                                                                                                                                                                                    | Gift from F. Cornet                                                                                     |
| OX468                                            | W1485 <i>F</i> <sup>-</sup> <i>leu</i> <i>thyA</i> <i>thi</i> <i>deoB</i> or <i>C supE</i> <i>rpsL</i> , <i>hupA-mcherry-FRT-kn-FRT</i> , <i>Str</i> <sup>R</sup> , <i>Kn</i> <sup>R</sup>                                                                                                                                                                   | Gift from F. Cornet                                                                                     |
| LY119                                            | MS388 <i>hupA-mcherry-FRT-kn-FRT</i> , <i>Str</i> <sup>R</sup> , <i>Kn</i> <sup>R</sup>                                                                                                                                                                                                                                                                      | This study; MS388 x P1.OX468                                                                            |
| LY248                                            | MS388 <i>hupA-mcherry</i> , <i>Str</i> <sup>R</sup>                                                                                                                                                                                                                                                                                                          | This study; derivative of LY119, <i>kn</i> removed via pCP20                                            |
| LY653                                            | DY330 <i>fhuB</i> :: <i>recA-FRT-Cm-FRT</i>                                                                                                                                                                                                                                                                                                                  | This study; $\lambda$ red <i>recA</i> at the <i>fhuB</i> chromosomal locus                              |
| SS3085                                           | <i>recA4155-gfp-Kn</i> (4155,4136), <i>Kn</i> <sup>R</sup>                                                                                                                                                                                                                                                                                                   | (Renzette et al., 2005)                                                                                 |
| MS388 <i>recA4155-gfp-Kn</i>                     | MS388 <i>recA4155-gfp-Kn</i> (4155,4136), <i>Kn</i> <sup>R</sup>                                                                                                                                                                                                                                                                                             | This study; MS388 x P1.SS3085                                                                           |
| LY769                                            | MS388 <i>recA4155-gfp-Kn</i> , <i>fhuB</i> :: <i>recA-FRT-Cm-FRT</i> , <i>Str</i> <sup>R</sup> , <i>Kn</i> <sup>R</sup> , <i>Cm</i> <sup>R</sup>                                                                                                                                                                                                             | This study; MS388 <i>recA4155-gfp-Kn</i> x P1.LY653                                                     |
| LY844                                            | MS388 <i>recA4155-gfp-Kn</i> , <i>fhuB</i> :: <i>recA-FRT</i> , <i>Str</i> <sup>R</sup> , <i>Kn</i> <sup>R</sup>                                                                                                                                                                                                                                             | This study; derivative of LY769, <i>Cm</i> removed via pCP20                                            |
| <b><i>A. baumannii</i></b>                       |                                                                                                                                                                                                                                                                                                                                                              |                                                                                                         |
| DSM30011                                         | Wild-type                                                                                                                                                                                                                                                                                                                                                    | (Repizo et al., 2017)                                                                                   |
| $\Delta$ <i>cdiA</i> <sub>1</sub>                | DSM30011 $\Delta$ <i>cdiA</i> <sub>1</sub> :: <i>apra</i> , <i>Apra</i> <sup>R</sup>                                                                                                                                                                                                                                                                         | This study                                                                                              |
| $\Delta$ <i>cdiB</i> <sub>1</sub>                | DSM30011 $\Delta$ <i>cdiB</i> <sub>1</sub> :: <i>apra</i> , <i>Apra</i> <sup>R</sup>                                                                                                                                                                                                                                                                         | This study                                                                                              |
| $\Delta$ <i>cdiBAI</i> <sub>1</sub> :: <i>kn</i> | DSM30011 $\Delta$ <i>cdiA</i> <sub>1</sub> :: <i>FRT-kn-FRT</i> , <i>Kn</i> <sup>R</sup>                                                                                                                                                                                                                                                                     | This study                                                                                              |
| $\Delta$ <i>cdiBAI</i> <sub>1</sub>              | DSM30011 $\Delta$ <i>cdiA</i> <sub>1</sub> :: <i>FRT</i>                                                                                                                                                                                                                                                                                                     | This study; derivative of $\Delta$ <i>cdiBAI</i> <sub>1</sub> :: <i>kn</i> , <i>kn</i> removed by pFLP2 |

Ap<sup>R</sup>, Cm<sup>R</sup>, Kn<sup>R</sup>, Str<sup>R</sup>, Apra<sup>R</sup>, Gm<sup>R</sup> resistance to ampicillin, chloramphenicol, kanamycin, streptomycin, apramycin and gentamycin respectively.



- Godeux, A.-S., Lupo, A., Haenni, M., Guette-Marquet, S., Wilharm, G., Laaberki, M.-H., et al. (2018). Fluorescence-Based Detection of Natural Transformation in Drug-Resistant *Acinetobacter baumannii*. *J. Bacteriol.* 200. doi:10.1128/JB.00181-18.
- Guzman, L. M., Belin, D., Carson, M. J., and Beckwith, J. (1995). Tight regulation, modulation, and high-level expression by vectors containing the arabinose PBAD promoter. *J. Bacteriol.* 177, 4121–4130.
- Hoang, T. T., Kutchma, A. J., Becher, A., and Schweizer, H. P. (2000). Integration-proficient plasmids for *Pseudomonas aeruginosa*: site-specific integration and use for engineering of reporter and expression strains. *Plasmid* 43, 59–72. doi:10.1006/plas.1999.1441.
- Hunger, M., Schmucker, R., Kishan, V., and Hillen, W. (1990). Analysis and nucleotide sequence of an origin of DNA replication in *Acinetobacter calcoaceticus* and its use for *Escherichia coli* shuttle plasmids. *Gene* 87, 45–51.
- Renzette, N., Gumlaw, N., Nordman, J. T., Krieger, M., Yeh, S.-P., Long, E., et al. (2005). Localization of RecA in *Escherichia coli* K-12 using RecA-GFP. *Mol. Microbiol.* 57, 1074–1085. doi:10.1111/j.1365-2958.2005.04755.x.
- Repizo, G. D., Viale, A. M., Borges, V., Cameranesi, M. M., Taib, N., Espariz, M., et al. (2017). The Environmental *Acinetobacter baumannii* Isolate DSM30011 Reveals Clues into the Preantibiotic Era Genome Diversity, Virulence Potential, and Niche Range of a Predominant Nosocomial Pathogen. *Genome Biol. Evol.* 9, 2292–2307. doi:10.1093/gbe/evx162.
- Tucker, A. T., Nowicki, E. M., Boll, J. M., Knauf, G. A., Burdis, N. C., Trent, M. S., et al. (2014). Defining Gene-Phenotype Relationships in *Acinetobacter baumannii* through One-Step Chromosomal Gene Inactivation. *mBio* 5, e01313-14-e01313-14. doi:10.1128/mBio.01313-14.
- Yu, D., Ellis, H. M., Lee, E. C., Jenkins, N. A., Copeland, N. G., and Court, D. L. (2000). An efficient recombination system for chromosome engineering in *Escherichia coli*. *Proc. Natl. Acad. Sci. U. S. A.* 97, 5978–5983. doi:10.1073/pnas.100127597.
- Zaslaver, A., Bren, A., Ronen, M., Itzkovitz, S., Kikoin, I., Shavit, S., et al. (2006). A comprehensive library of fluorescent transcriptional reporters for *Escherichia coli*. *Nat. Methods* 3, 623–628. doi:10.1038/nmeth895.



# Supplementary Figure S1

A.

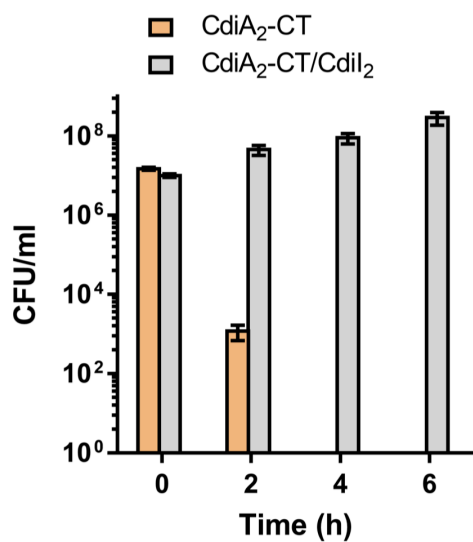

B.

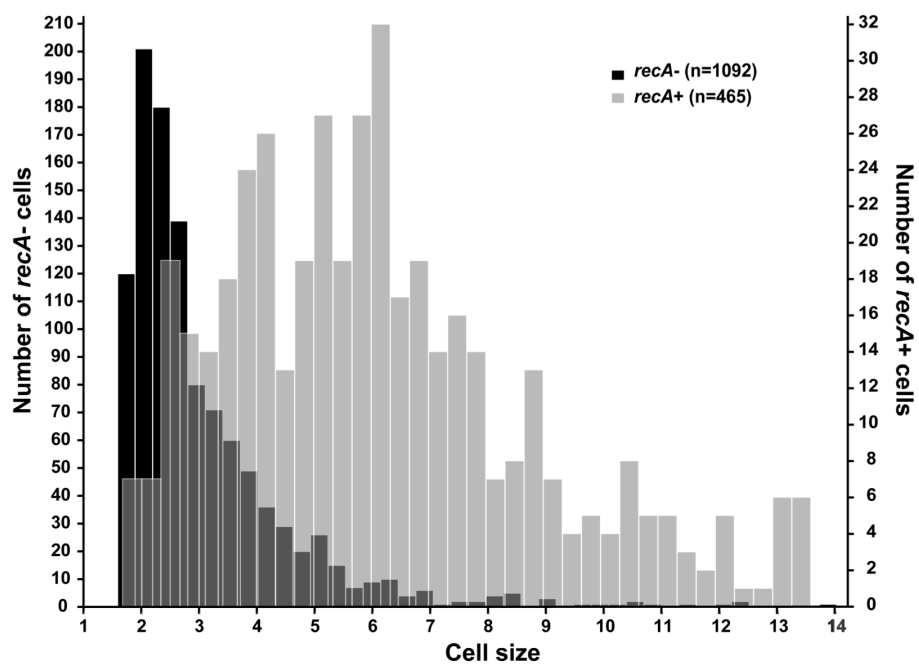

## Supplementary Figure S2

A.

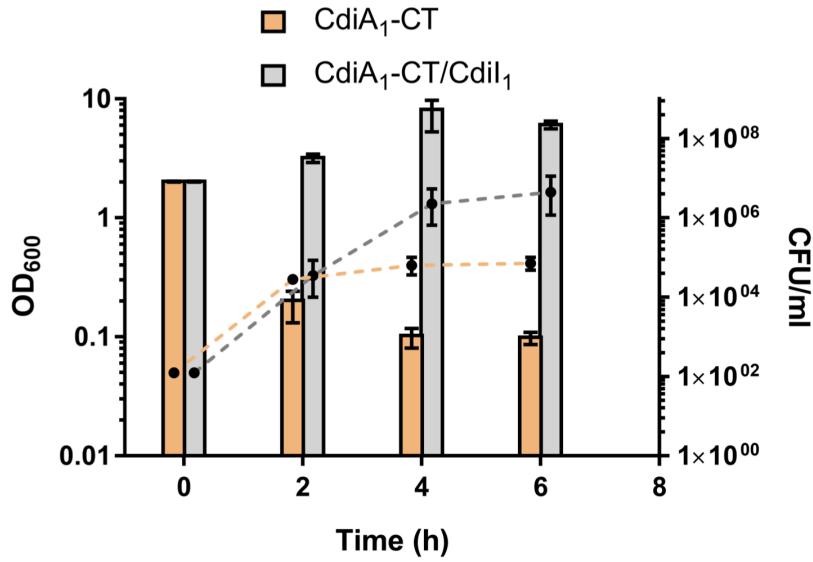

B.

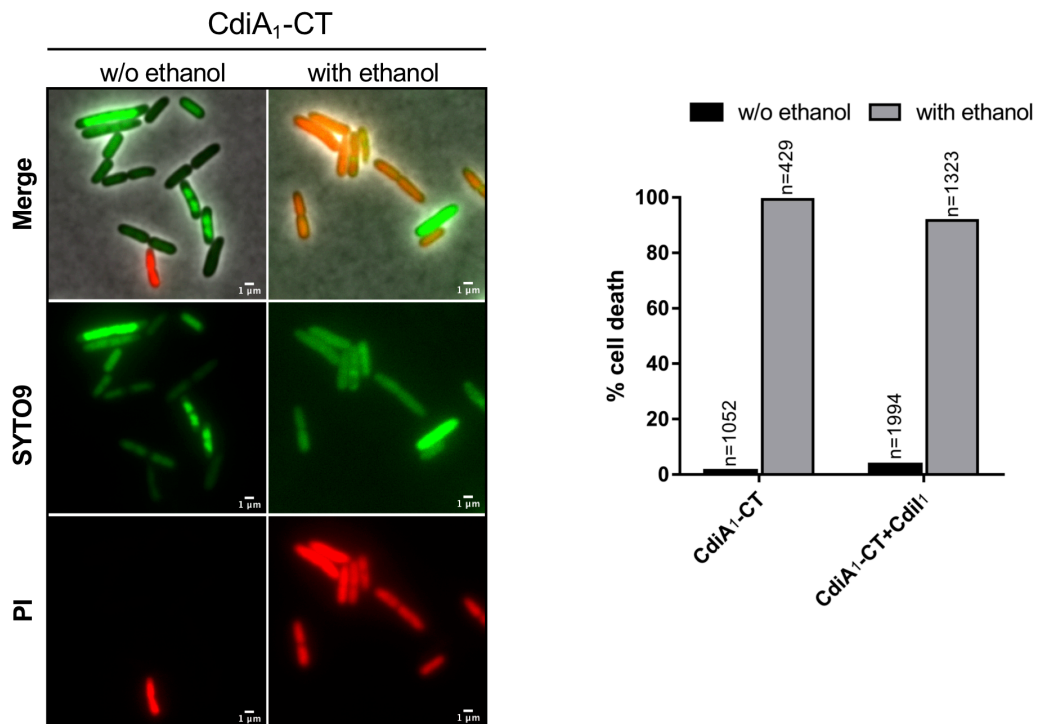

### Supplementary Figure S3

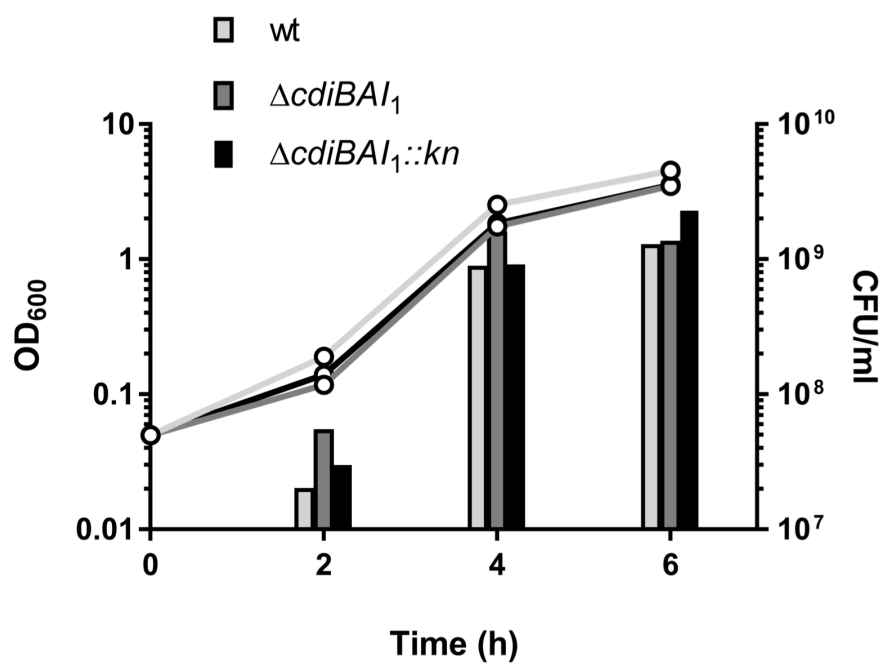

## Supplementary Figure S4

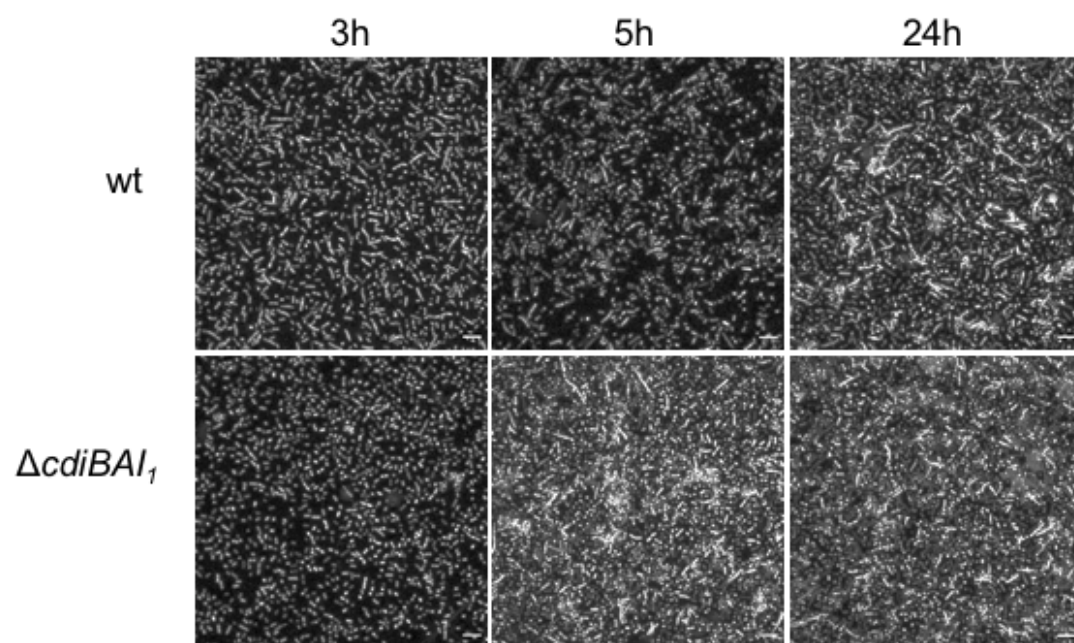

## Supplementary Figure S5

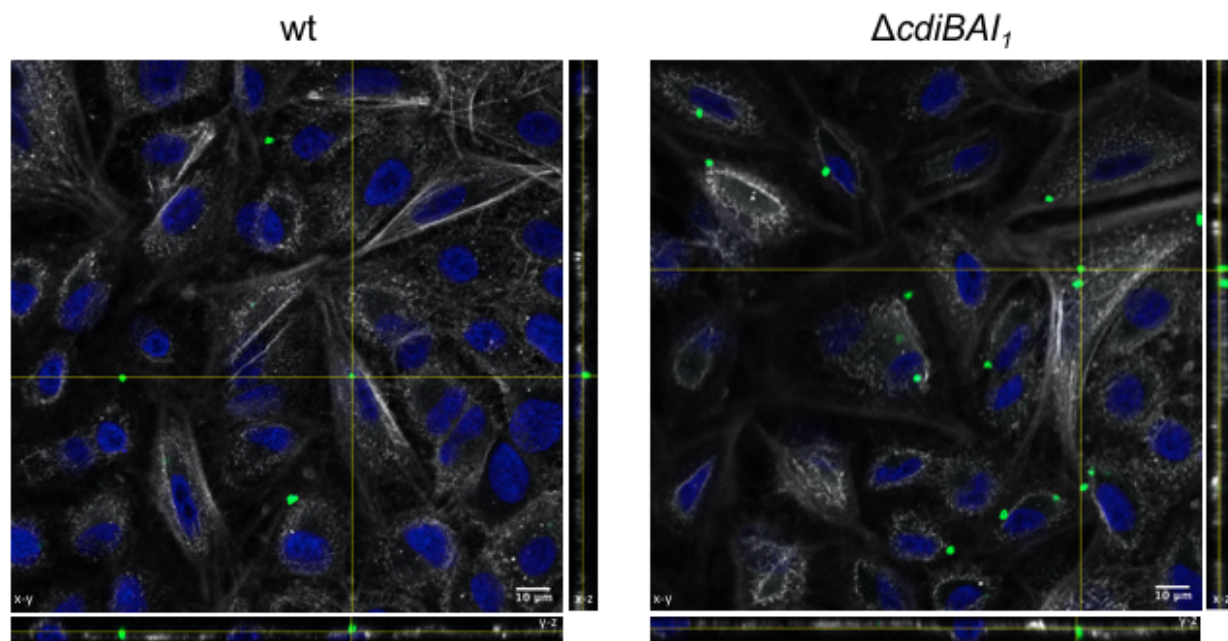

# Supplementary Figure S6

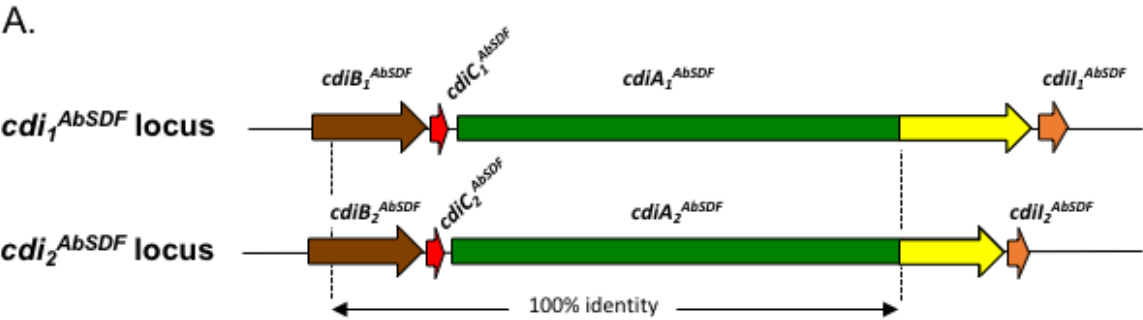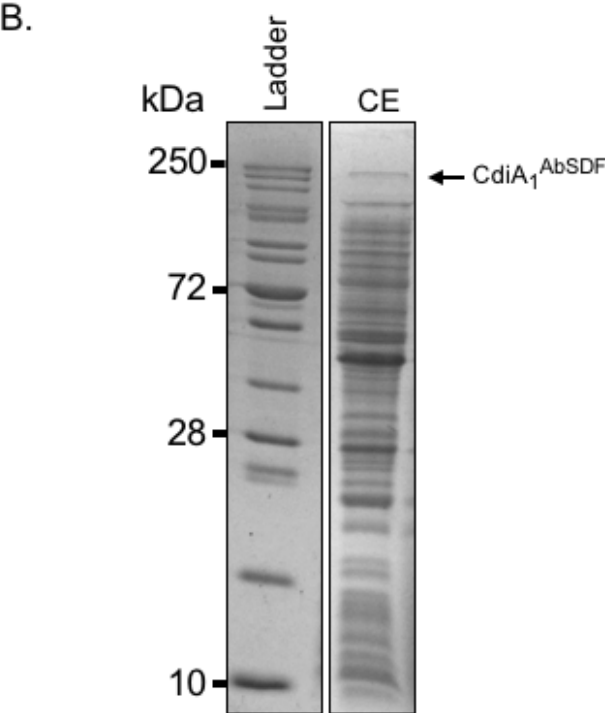

## Supplementary Figure S7

*cdiA2* *AbSDF* (*ABSDF\_RS16510*) gene region

ATGAATAAGAATCGTTATAGAGTGATATTTAGCCAAGCACGTGGCATGTTTCATTCGCGTTGCAGAGATTGTAAAAAGTCGTACAAAAATGGCTG  
GACAGAGCATAGCCGAGGTAACGAGACTGTAACGAATTCACCTTACACCGAACAGCTATAAAAAAGTTGAATCCACTCCATTTTCTGTGGTGAC  
GCTATTAGGTGCAGTGGTGTATACCATTCCACTTCTTAGTATTGCAAATACCCAGATTTCATGCTGACAAATCAGCACCTTCAAATCAACAGCT  
CAGATTCTCAACTCTGCCAATGGTACGGTTCAGTCAATATTCAAACCCCAAGCGCTGGTGGCGTTTCTCGAAATACCTACAGCCAAATTTGATG  
TAGGGCAACAAGGTGCCATTCTAAACAACCTCGGCAATAACGTTTCAGACCCAAATTTGGTGGTGGGTGACGGGCAATGCAAACTTCGAAGAGG  
TGAAGCCAAAGTTATTCTCAATGAGGTCAACTCAAGTAATCTTAGCCAGCTTAGGGGCTATCTGGAAGTTGCAGGAAAACTGCACAAGTAGTG  
ATFGCCAAATCCATCAGGTTTAGTCTGTGATGGCTGTGGGGTGATCAATGCAGACCGCTTACTTTAACTACAGGTGAGGCGGTGATGAATCAAG  
GTTATCTTGAGTCATTCAGGTACGCGAAGGACAAGTCAACCTGAGGCAAGGTTTAAATGGGAGCCTGACGCCATATACCGATATCTATGTC  
CGGTGCATTTAAAGTCAATCGAGTTTATAGCCCAATGAGCTGAGCAGCAAAACAGTATTGGGTCAAACGACATCAGTATTTCAAGCACTGCAACCA  
CAAATTCGCAAGCAACGACAGGAACTAATACAACGCCTCAGCCAGACTTTGCCCTTGATGTGGGTCAATTTGGGTGGCATGTACGCTGGAAAA  
TCTATTTAGTGGGAACGACCAAGGCTTGGGTGTACGTAATGCGGGTCAATGAACGCAACTACAGGTGAGTTGAGTTTGAATGTAAATGGAGA  
CTTGATCAATCAGGTAATGATTTGCCAACAAGACCAATTCGCATTCAAGCGCAAAACATAAAAAACAGTGGAAATATCAGTAGTACACA  
CAACAATTTCAATCAACGCCGATAAATTCAGAACGTTGGTTGATTTGCCAATGATGAATGAAATCCAATGAAATGAAATGAAATGAAATGAA  
ATAATGACGGTGTCAATGCAGGACGGATTGACTTTACAGCGCAGACCCTCAGCAATGACAAAAGGAAAAATTTGAACAAACAGGCCAGCAACA  
ACTCAATATCAGTGCAAAACACTGGATAAATCTCAAGGGTGTATTGGACAGGGCAGCAAAAGAGAGCAGTGGAAATCAGGCGGAAACAACACC  
CCTAGCGTAACGGACCCGGAACAACAATCTTCAGCGCAAGACTCAAGTACCCTGAAAGTTGCACCAGTTGATCTGACCCCTAAGACTTTCCAAA  
CTGGGAACATTAAGTTCAGGTTTATGATAATGTGACGCAAAACAGTATTGAAATGAAATGAAATGAAATGAAATGAAATGAAATGAAATGAA  
AAATAATGCTGGTGAATTCAGTCACTGAAATTCGAATTTAGTGGACAAAACCTTCGAAAACCAACAAGGTAATTTACGGCTAAGGTGGTGAAT  
ATCAATGCACAAAATATCGATAACCAAAAGGTTGTGATGAGTGTAGTCAAAGCTTTGATTTAACTGCCCAACAACCTCAATAAATCAAGGCG  
GTTTACAAAAGTACAAAGGCATGAATATCAGCGCAACTGAGATTGATAATCGCCAAAGTCAAATCTCGCTGTGATGCATGACGCTAAATTC  
ATCCAATACCAATAACACAGGTTGCTTCAATGCTTCAAGTTCAGTTCAGTTCAGTTCAGTTCAGTTCAGTTCAGTTCAGTTCAGTTCAGTTC  
TCTGCACAGAATGTGCATCTGCAGGTCAGAGCTTAAAGAATCAACAAGGTACGATTCAGCCAAAACAGCAGACTTGAATATCAATGTTGATC  
AGATTAATAATGATCAACCAAGATTTAGCAGTAATCTGATTTGCTGCACAAAATTTAAACTGAATGCGCAGCAGCTACAAGTACGGGACA  
AATCTATGACGAGGATACAGCAGACTTACCGTTGAACAATTTAAACAACATGTTCAACTGCAGCCTTAACCGAGTTTCGTGTTCAATCCAAA  
GATATTGAGAGTACCAAAATGCAATTTGGGTAGCAGGACTTGATCAAGAAGGCAAGTTGAGTAATACCCAGCTGAATCAATATGATGCAC  
AAAATGCACAGATTGCGGGTAAATTTTATCTGGAGATCAGATAAACAATTTAAAGCTGCTCAAACAACCTGACTTAAAGTCAAAGTGAAGCCAA  
CAAAAACGTTCAAATGAAACGACACAATTCGATACCAGCAGTGCACAAAATCAATTCAGCAGCCGCAATGATATCCGTGCTCTACAAGTATA  
AATAATGAAAAGGGCAATATAGTGGGAACAGGTTCAATCTCAATACAGCACAACCTCAATAACAACCAAGGTTTAAATCCAACACACAGGCAAAA  
ATGATTTTATCTGAAATGGCAGATCGTATTTGCCAACCTGCTGGGAAAATTTACGCAATGCCAAACAGCTGAAATTTAAACCAATACATTT  
AAGTCTGTAGCAGGTAATTTTACATGTCAGGTGATCAGCAATTTAAATAATTTACGCAAAATTTGCAAGGCAACAAGGCAAAATTTAAAGT  
AACAGTACTTACAGCTGAATCTAGGCACTGCCAATTTAGACAAGCTTTGACTGCAGCACAAGTATAAATCTGACCGCAACAGAACTGAGCC  
ATCAACAAAGGCAATTTGATTTCAAATGATGCCAATGGGCAATTTGCAAGTTAACCTTGTACAAAACCTTAAATAAATATGTCAGGTTGATCAGCC  
AGCGGTTAGTCAGCATAAAAACAGCGGATTTAAATAATCAAAGCTGTTGATTTCAAAACCTCGCAAATTAAGACTTGAGCAATCGAAAGTCAA  
AAACTGAGAAATCAGTCTGGTAAATTTGTCAGGGCTGTATGAGCAGTATAAAAACAGCTCAATTTGAATTAACGACACAGGGACTGTCTACGCAG  
CAGGAAAATTTGGACTGCACGCAACACAAGATGTAAGCAACCAACAGGTTTAAATGCTGCAAAAACAATCACTCAACATTTGAAGCACAGAACCT  
AAACAATTTCTAAAGGGCAGATTGACAGCGAATCTGGTGTGCAAAATCAACCAATTTGCCAGATATTTGAATAATCAAGCAGGTCATATTTCAAGCT  
GCAACCGCATTGAATATTTGGTCTACTCAAGTTGAAAACCAAGCCGAGCTGTTTCAAGTACGGATACACAGCTTGTATTTGCACATCTGA  
ATAATCAATCAGGCACATCTACTCTAAAACAACAGCTGATCTCAAAATGATTTGAGCAGCAGGATAAACAGTGCAGGTACCCCTGCGGCAAGCA  
AAATCTAAACCTAAACACGCAGAACTTATTGAATCAAGCAGGACAATCCGTTGAGAAAATGCTGATTTAAAGTTAAATACTGCTCAAGATGTT  
CAAAAACAATACAGGTTTAAATTTAGCCGCAAAAATCTGAATCTGCACGCAAAAACAATTAATTTCAACAACAAGGTTAAAGTCCAGTGGGGTCAA  
ATGCCAATTTCAACTGAACAACCTTTGACAATCTGAAGGTGGTGGTTATGCGGAGGAACAATTAACAGTTTCCGGCAACAGGTAATTAACAAA  
TAGCAAGGTTTCGTTGCGCAGCAACCTCGACTGATATTAGCTGAGCTGGCTGCTGTCATCAATGATGCTGCAGCAAACTCCGTTCAACCAAGATCAA  
TTGAACTGAACGTTACAGCAGGATATCAGTAACCAAAATGGTGAATCTCTGCGGCAAAATCGATTGAGTTGAATGCACAAAAGTCAAGTAAATC  
AAAAGGTTAAAGTGAATTCAGGCGAATCACTGAATGTTACTGCTCAGCAAGTTGATAGTATTGAAAGCACAATCTACGCCAAAGAGCAGTTGCA  
TCTTACAGTTGCAGATCAATTAATAATCAGTCTGGCAGGATTCAGCCAAACCACTCGTTCAGATACAAAGCTAAAACCTGAATTAATACGGCT  
GGAAAAATCCCGTTCAGAACGAAATCACTGGATTTGAAATGATGAGTACGCAATGAGCAGGTTCAATTAACAGCAGGTTCAATTAACAGGCAAGT  
ACATTCACACAACCTGAATGAATAACCAACAAGGCACCATCTACAGCCAAAATCAGTTGACTTAAATGCCTCTCAACTGAACAATCAGCAAGG  
GCAGATCTATTAGGAGGTCAAGAACAGCTCAAAGTTCAGGGCGATATTCAAAACCAAAAGGGTGTATTGGCAGCTGGACAAAACCTTAAACATT  
AATAGTGCAGGTTGGATAATACAGCAGGAACAATACGCTCAGAAAATGCTGATATTACGCTGAATGCACAAGGACAGTTGATTAATGCTCAAG  
GCGATATTTATGCTGGGCAATGCAAGTTTAAATGATGTTGGTATTTGGCAAAATGCTGCAAAATGCTGCAAAATGCTGCAAAATGCTGCAAA  
TACGCAAAAACAGCAGCTCAGTAATCAAATGCTAAAATTTATCGCTAGGGCTGTAGATTTAAAACTGGAAAACCTGGATAACCAACAGGCTTA  
ATACAAGCTGAACAGTCAAGTAAATCGATACTCAACAAAATGCCTTGCTCAATAATAACTCAGGAAACAATGCGGGAATACTCAGTCAAGGCG  
GTTTAGATATTGCCAATGTTTCAACTTGAATAAGCAATGTTTATATTGACGCGATCGGTTGAGCCAACTGACTGCTCAGAATATCAATAA  
CAACAGTGGTCAATCAATAGCAGCAAGCAGACTAACCATACACAGCAGGTTGGCAGGTTGGCAGGTTGGTTCGATCGATAACGCTTGGTCAATTCAGGCA  
CAAAAATAATCAGTTTAAATGCCGACACGATTAATAACGCAGGCACAGTGAATCATTATTGCTGGAGAAAAGCTAACAGCGAATGCCAGCA  
AAGTGAATGAGCAGACCAAGATAGCAATTTACTCGGTGGTTTACATGCAAAAATATTGAAATCAATGCGGGCAGTTGGATAACCAATC  
TGGCGTATTGCTGCCAGTGAATGCAACATTTGAATATCAACAACCAATGAGCAATCAATTTGGTTCATCACTAGTTTAAATCGTTTAAAT  
ATTGGTACAGCAAAATAAATCCATAATTTAAACAATACAGATGGTGAATTTACTGGCAAAAATCAGCTCAATCTGAAAGCCAATGAATTTGGTTA  
ATAAAGGCAAGATTATCAGTGAAGTAAATGTCGATATTGACTTGATGCAAAAGTTATAGCCATACCCAAGCGGACCAAAATGCGGCGAATGGCAC  
ACTTAACTCAGTACCGAACAGGATTTAATCAATCAGTCTGAATGAGCGCAGGACAAAAGTTGAATGAAATGCAAAAATATTTCAAAAACCA  
ACAGGTCGAGTATTTCATCTAATCAGACTCATCTGATTTGCACAAGATACCATACATAACCAAGGCTTAAATCAATGGTGAAGTCAACCATTC  
AAGCAATCTGTTGGTGGTGGTGCAGCTATTTAAGTGGTGGTGGTGGTGGTGGTGGTGGTGGTGGTGGTGGTGGTGGTGGTGGTGGTGGTGGT  
CACAGGTCAGTATTGCTTACAGTGGAGATATGGATTTAGGATTTCAAATCCATAAATCAACCAATCTGGTGGTGGTGGTGGTGGTGGTGGTGGT  
GATAACGCTTGGATCTTTAGTGCAGGTCAACTCAATGTCGGTGGCAGCCTAAAATGAAGAACTACAAGCACAAGGCAATGCGGACAAAATTTACA  
ATGGCAGTGGCGTTATTGAATCTTAGGAGATATGATCTCGGTGCAAAATATTTCAAAAATCAAAATGAAAACCTGGTTATAGCGCTGATTTGA  
AAAATATGAAAACAAGTACATGAATATGGCAAGATGCGGAGGTTGGGATTTGGGATTTGGGATTTGGGATTTGGGATTTGGGATTTGGGATTTGGG  
AATGCCATACTGTATGTACCACAAGAAGAGGTTGGAGCGCCAACAAGAGAGATTTGGTGAAGTTGGAGCTATTATGAATAACTCAAATTCACA  
GTGAAGATGAGGTTCAAATCCACAGCCCGCACAAATTTATGCGGGTGGCAATCTAAGTTTATACACCAGATGCTGACTTTGTAATAAAGACAG  
TCAAGTGTGGTGGCTTCCAAATCAACATGGCATCGGCTCAATGAGCAATCAAAGTACCAGCTTAAAGAGTGTAGATCAGACCCAGCTGGG  
GGATTCAGTCAAATGGCAATCTGTGCGGTTGGAAATCAAAAGGACAGGATCGTCAATCGATGGGGAAGTAAAGTCAATTAACCAACAGCCGATGATA  
TCATCAATACCATGCCGATCAGTTTAGGATTTGAAAAGAGTATACTTACAGCAATCTGCAATCTGTTGAAAATTTAAATAGCAGCAATGT  
TCAAATGAGATAGCACAGGCACAATCAGTTGATCTAACCGCATTAAGTACACAAAACCTCAATAATCAACAACCTCGATTTAAATGCGGGTCAA

AGCATCGCTGAAATTTGGAAAAATATTCAACAACCTGATTTGCCTGATCAAATCGGCCTTGAAGCCAATCCGACCACAGACATACAAGCTGAAC  
AAAAAATATTGATCGCGTTGAAGGCGAAGAATTAACCAAGTGAATAACACTGCTTCAGCAGTCGATTCAGCGACCGATATTACAGTTTCGTAC  
GGTATCCGCAAGCTTTTAAACTTACCAGTAATGCTCTATTTTATCCACCACCAAGACAGTCAAGCACAAATATTTGGTTGAAACTGACCAGCC  
TATGCAAATTTATCGGAACCTGGTTGTCTTCAGACTACATGATTAAGCATTGGGCTCGATCCTGCAATGCAACAAAAGCGCATCGGTGATGGTT  
ATTACGAAACAGCGTCTTGTACAAGATCAAGTTGCAAACTCACAGGTTATCGTTTCTTGAAGGCTATGGTTCCGATGAAGAACAATATAAGGC  
ATTGATGAACAATGGCTTGTCAATTTGCTAAACAATACAACTCAGACCGGGTATTGCATTAACAGAGACGCAAAATCGCTCAATTGACCAGTGAT  
ATTTGTTTGGTTAGAAAGAAAAACAGTCAAACTTGCAGATGGTACGACCAACCAAGCACTCGTACCTCAAATCTATGTCAAAGCAAGATCGGTG  
ATTTAAAAGGAGACGGTACACTTATTTAGCGGATTCAATTAATGGATGTACAGGGTGACGATTTAAATTCAGGTACCATTGCAGGACGACA  
AGCCGTTGTTTTAAATGCTGAGAATGTGAAAATCTGAATGGACGAATCAAGCGAATCAAGTTGGGCTCAATACAAGCAAGATTTAAATATT  
ATCGGTGGACAAATCAAGCTGAACAAGCTGTTGATTTAAATGTAGGGCGAACTTTAATTTAGAAAAGTTCAACACAGCACAGTAAAAAATAAG  
TCGGAGAAAGCACTTTACTTATACAGTCTTATGATCGTGTTCAGGTTTATACCAAAAGCACCAACAGCGATTAATTCGAGTGAATCGGTGAAA  
CCTAAAAACCTCGATTTCAATTCGTGTTGGTGGTATTTCGGATTTAAAAGCAGCTCAAATTCAGAATGCAAAATGGCTCTACTCAAATTCGACA  
CAAGGTAATTTGAATTTGGTGCCATTCAAACAGGCATTAGCAATAAAGGCTATGCAATGAAAAGAACTATAACTATTCAATCACTCAAATCG  
ATCAAGGTAGTTCAATCAAAGTCAAGGAACAGCTAATTTAAGCGCAATAAAATTAAGGTAAGCAGTCGATATCGCAAGTCAGCAAGGTGA  
CAATTTAACTCAAGCGAACGATGTATGTTGGATCATCGGTTCAACAGACATACAGGCTGATAGTGTGATGAGTCAAGGATGAGTAACTGAAAG  
CTTGGGCGCAATACTGAGCGTAATGAGGTTTGGAACTCAGATCAGTCGATTGCCAATAATTTAAAAGCTGGTGGCAATATTTGTGCTGAATACAT  
CGCAAGGTGATATCACAGCGACCCATCTAAAAGCGAATGCAGGAGAGACTATTAGGTTCAAGCCAAAATGGTCAATGTAACCCAAAATTCAGC  
ATTAATGAAACAGTCAAAGTACGACTTCTTCAAGCACAACCTTTGCAACTTATAACAATCGACAATCTGGTTATATCGATCAAGAGGTTGGC  
CAAACCAAGTTGGTACGATGATGTTGGATCATCGGTTCAACAGACATACAGGCTACAGGCTAAGGCTAAGGCTAAGGCTAAGGCTAAGGCTAAGGCT  
ATGTGGGCAATACTTTGATGCAACGTCGAAGTGGATGGAACATTTAAAAGCTGCTGATGGCTCCGTTGATGCTGAAAATGTAACACTGAGTACATT  
GAAAACACATGACCAGCAATGGGACGAACAACAAAAGGTTATCGTGGTGTGTTAAAAGGTTAATGAAAGTCAACGAAAGTTGGTTAGCTGGC  
GTTCAATCTTTATTTCCAGGTTGTTAAAGTGGACACTAACTACTATAGGTGAGTCCAACAGTAAACCGGAAGAGCAAAATTAACAAACGGGAA  
CAATTTAACTCAAGCGAACGATGTATGTTGGATCATCGGTTCAACAGACATACAGGCTACAGGTTCTGTATATTACTGCAAGAAATACGATTTCT  
TCAAAAAGGTGACATTGAATGCGGCTGAAGAACAAAACATTTAGCCACTTCACACAGTAAAGAAACCATTGAAGGCTTAGGGCTTAAGCTCAAC  
AAAGATAGTGTACGTTTAGGTGGCTTTTGTGTCAGAAGATACCAGCAAGTACTAAAACACCAGGAACTACTACAAGGAGGTTCAATCCAGA  
CTGAAAATCTTAAAATACAAGGTGCTGAAGGGTGGATATACTCGGTCAAATATCAAAGCGACAGGTGATCTGTTCTTGTATCATGGTTCGAGG  
CGATTTAACTCAAGCGAACGATGTATGAAAATAAAACACAGGTTGAAAGTAAAGATACAGGCTAAGGCTAAGGCTAAGGCTAAGGCTAAGGCTAAGGCT  
TATTTGGATGCTGCACTTGCAGTAGGTGCGGTCAAAAGTGCAGCAGAGGTTGGTAAAACAGCCAAAAGTCAATATAGTCAGGCACAGCGTGATT  
ATGCATCAGGTAATAATCAACAAAGAACGACTGGACGACACCAAGCCAAATGTTGCAATGGCAACAGCCAAATCTTGCAATGCACAAATTCGCGG  
AGGTTCCGCGAGCAACCCGACGACGCAAGTTCAGCACTTACGGCTTTACCAATGGTGCACAAAGGTTGAAAGTATCGAAACCCACCACCAGCA  
AATACCCTCAAGGTAATGGCAAGGACGTCAGTTAGATTTAAATAAATTTGACACTTAAATCAGAAAATCAAGATGTTAATTTGCAAGGTAGC  
GCTTAAACCGCACTGGAACGACCAATTTGATGGAACGAAAAGATTTTAAATATCAGTGCAGGAAAAGAACACCGTCAACAAAGAGACAGCAGTAA  
AACCAACAAACAAAGTGTGAGCTATACCTATGGCGGTGGTGGCAGTGCATCAGTGGGCAAGCAACATCGAAATCACACGCTGAAAGCCTAACT  
CATGTGAACAGTGAAGTTGCATTAACCCGTACAGAAGGTCAGTTGAATAAACTCAATATTAGGGCGGTGAAGTTTCTATTGCTGATCGGGGTA  
ACTTTTAACTTAACTCAAGTAACTGTAAGAAAGTTTACAAGATGACAGTACAGGCTAAGGCTAAGGCTAAGGCTAAGGCTAAGGCTAAGGCTAAGGCT  
TTCAGGTTGGTTTGAATATGTCACAGCAAGTTTATAACCAAGCCAAAAGTCAAATGATAAAGCTTGGGTGAATGAAACCAGTAAATGCTGATC  
GGCAATGCACAAAATGATGCAGACCTAGATGCGATGGGTGTGCAAAAGGTGAGTAATATTTGGTGGCGTATTGCCAATTAACCTAAGAACTCAG  
ACGCAAGTCTAACAGATCATGGCAAACGAAATATAACAGGAGCACTCGAACTTAAAGATTTACAAGATCATAGCTCAGAAAGCAACCGTGGCTT  
TAATGTATCCAGCAGTGTGGGCACATCGATTAAGGTTAGAGCAAGGAGAGCTCATTCCATCCAAAGTGGTAGTACAACCGTTGGCTTGCAAAGT  
ACAGGGAATGAACAAGAGCAGTTAACTAAAGCGACAATGGGTCAAGGCACATTGAAAATAGCACTGCGTGTGCTAACCCTGATATTAACAATA  
CTCAAGAAATCAACCGAGACCAAGCAGCAGGTTTATTGAATGGTTCAGTACTGTCGACAATCGTTTATTGACAGAGAGTGGTCTGTCAGCAGAT  
TATTCAGAGCAGAAGGATTTACAGAGAAATTTAAAGCAAAACAACAACAATAAAAATGATGTTGAAAAATAGCTTTAAAACCTACCTGAT  
TCGAAAATCAAATAAAAATAACTACTCTCTTAAACCAATGGTTCGGAGGAGATATGATGCTGATGCATACAAAGATTTCTTAAAGATGGAG  
GATCAAAAAGAGGTTTTTTGTTGATAGCGAATAATTCGTATGCACAGAATTATATTAAGGATTTAGCTGATGCAAAATGAAAAATACAAGAAAT  
GGAGTCTAAGGGATATAGTTTGAACAATAATTTGAATACGAGCATTGCTTCAATTTGGTGAATCAATGTGATTTTCAAGTAAAGGTCAGCATAAG  
GTTAATTTAACTGATACCAAGATTGGTATGCAATTTGTTAACTGCACTCGTATGGATTATCGAAAGGCTATTCTGATTTTCAACAGGAAATGA  
ATGATAAATATGGAGTAGAGATGATGCGAAACACTTCTGTTGTAATTTGAAACGATACACTTACAGGCTCGCTAAGACTGTTGCAAAATGCTT  
ACTGCTAGTCAATATGGGGAAATATTTCAAAAAGCCAAAAGATAAAGATATCGACCTTCTTCAACAAGCATAACGGCAATATCTATGTTACA  
GATACAAATGTTATTTTACGTATACGAATCCAGAGTTAAGGGATCAAAATAAGTAAAGAGTCTATTAACACAGAATGGTCCAAAGGATGTAA  
GTGAGAGTAAAGGAGGCAAAAATTTTAAACAACATCATTGCAGGGATTGTAGTTGGTGGGGTAGGAAAGGGTGTGTTAAAGGGAAGGACTC  
TGAATATGACATATCTAAGTCAGGTTTGAATAGGTAGCATACTCTATAACAGGTCATAAAGTTTAAAGTACCATAAAGATGAAAGCAAT  
AATACAAATTTGGAGATTAATTTGATAGAGGGAACAAAGCCTTCTACTAAAGATAAAGTAAATAAAAACGGATATTAATATTTGAAAATCCTGGCC  
ACCATGACCCTAAGGAGGAAATCAAAATGGTTACAATAAGACAAAATCAGTTCTGCCAGATAACCATAAGACTTTATGGGACAAATAGTATTGT  
AGCTTCTGATGGGAATAGGTGGCAGTAGAGGTTGATAACGGGAAAAAGTTTATCATCGCTTCCAAAATGATGGTAATGGTAATTTCCATTGG  
AACGGTTCTACGAATGGTAAAACAGCAAGTGGGGTTGATAGAAGTGTATTAGCAAAATCCACCTGAAAATTTGAGGAAGTAAatgttattt  
ggtgatccctaggtattgatgttaatagtaagcaagaaagatcATGATTAACCTTAGT
